# Supplementary material
Source: publisher figshare collection journal article supplement (https://adisjournals.figshare.com/ndownloader/files/38127933)
Supplement: Supplementary file 1 [file 38127933]

# SOCIETAL PREFERENCES FOR MENINGOCOCCAL B VACCINATION IN CHILDREN: A DISCRETE-CHOICE EXPERIMENT IN SPAIN

F. Martínón-Torres, Á. Gil de Miguel, J. Ruiz-Contreras, L.A. Vallejo-Aparicio, A. García, M.C. Gonzalez-Inchausti, E. de Gomensoro, Z. Kocaata, C. Gabás-Rivera, M. Comellas, M. Prades, L. Lizán

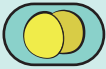

*Neisseria meningitidis* serogroup B (MenB) is the most common cause of bacterial meningitis in many industrialized countries.

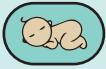

Most cases occur in children, with infants less than 1 year of age being the most frequently affected.

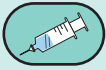

It can be effectively prevented by vaccination.

In absence of a National Immunization Program in Spain, the risk-benefit and financial impact of immunizing children against MenB needs to be weighted.

THE STUDY explored societal preferences (represented by parents and paediatricians) regarding six attributes of a MenB vaccine through a **Discrete Choice Experiment\***.

- 1 ATTRIBUTES SELECTION BASED ON:**  
(i) literature review  
(ii) experts to validate attributes

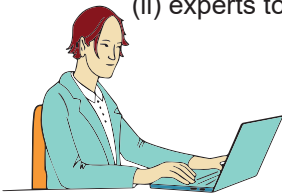

- 2 SURVEY**

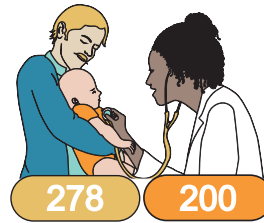

Parents Paediatricians

## SIX ATTRIBUTES

- Age of protection
- Cost
- Duration of protection
- Percentage of protection
- Adverse events
- Expert/Authority recommendations

## WHAT PARENTS AND PAEDIATRICIANS VALUE MOST

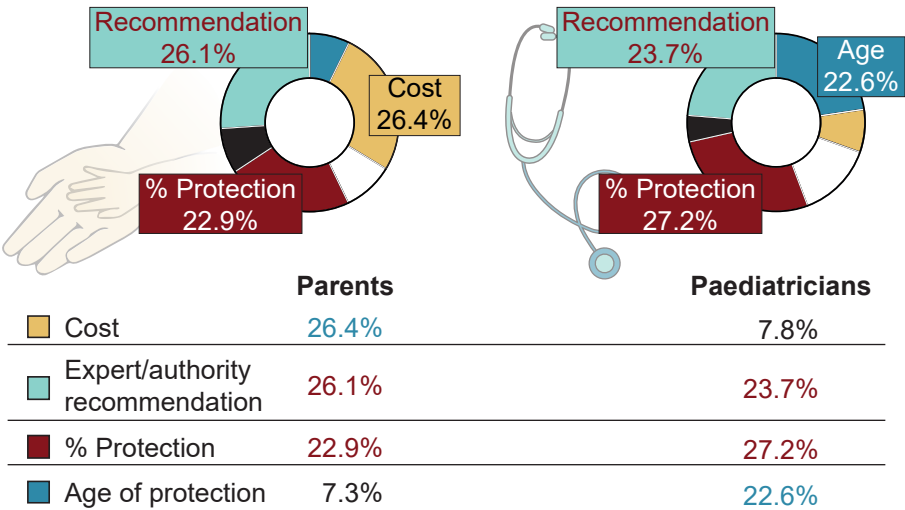

Expert recommendation and percentage of protection were essential attributes for both groups.

Considering the preferences of key social segments is critical when including new vaccines in National Immunization Programs.

\*This methodology, aimed here at assessing individual preferences for MenB vaccine, is based on the premise that medical interventions can be described as combinations of different attributes
